# Supplementary material for: Self-adaptive interfacial cooling for sustainable energy–water cogeneration in photovoltaics
Source: Royal Society of Chemistry journal article supplement (doi:10.1039/d5el00150a), 2025-01-01
Supplement: d5el00150a1.xlsx [file d5el00150a1.xlsx]

## Sheet: Data
Tech type	Component	Unit price per m2	Lifetime (year)	Manufacturing Cost
PV	PV panel	68.94	12	0
IEWC	PV panel	68.94	12	0.05
	Evaporator	0.312	1
Spray cooling	PV panel	68.94	12	1.818
	Nozzle	0.349	1
Tube plate	PV panel	68.94	12	2.05
	Copper plate	8.92	12
Flat plate	PV panel	68.94	12	3.13
	Glass	2.66	12
Discount Ratio	PVIFA	PVIFA1	IEWC	Spray cooling
8	7.5361	8.13899	2.53936	2.84051
7	7.9427	8.49869	2.65159	2.96604
6	8.3838	8.88683	2.77269	3.1015
5	8.8633	9.30647	2.90362	3.24796
4	9.3851	9.7605	3.04528	3.40642
3	9.954	10.2526	3.19882	3.57816
2	10.5753	10.7868	3.36548	3.7646
1	11.2551	11.3677	3.54671	3.96731
0	12	12	3.744	4.188
Initial Investment
PV	68.94	IEWC	71.5294	Spray cooling PV/T	73.5985	Tube plate PV/T	79.91	Flat plate PV/T	74.73
			71.6416		73.724
			71.7627		73.8595
			71.8936		74.006
			72.0353		74.1644
			72.1888		74.3362
			72.3555		74.5226
			72.5367		74.7253
			72.734		74.946
PV O&M Ratio
0.03

## Sheet: IEWC result
PV Total Lifetime Cost			IEWC
Discount Ratio	Value			3	4	5	6	7	8	9	10			3	4	5	6	7	8	9	10
8	84.5262			91.0101	97.3822	103.754	110.126	116.499	122.871	129.243	135.615			91.0101	97.3822	103.754	110.126	116.499	122.871	129.243	135.615
7	85.3671			91.0101	97.3822	103.754	110.126	116.499	122.871	129.243	135.615			91.0101	97.3822	103.754	110.126	116.499	122.871	129.243	135.615
6	86.2794			91.0101	97.3822	103.754	110.126	116.499	122.871	129.243	135.615			91.0101	97.3822	103.754	110.126	116.499	122.871	129.243	135.615
5	87.2711			91.0101	97.3822	103.754	110.126	116.499	122.871	129.243	135.615			91.0101	97.3822	103.754	110.126	116.499	122.871	129.243	135.615
4	88.3503			91.0101	97.3822	103.754	110.126	116.499	122.871	129.243	135.615			91.0101	97.3822	103.754	110.126	116.499	122.871	129.243	135.615
3	89.5269			91.0101	97.3822	103.754	110.126	116.499	122.871	129.243	135.615			91.0101	97.3822	103.754	110.126	116.499	122.871	129.243	135.615
2	90.8118			91.0101	97.3822	103.754	110.126	116.499	122.871	129.243	135.615			91.0101	97.3822	103.754	110.126	116.499	122.871	129.243	135.615
1	92.2178			91.0101	97.3822	103.754	110.126	116.499	122.871	129.243	135.615			91.0101	97.3822	103.754	110.126	116.499	122.871	129.243	135.615
0	93.7584			91.0101	97.3822	103.754	110.126	116.499	122.871	129.243	135.615			91.0101	97.3822	103.754	110.126	116.499	122.871	129.243	135.615
Choosed Value				91.0101	97.3822	103.754	110.126	116.499	122.871	129.243	135.615			91.0101	97.3822	103.754	110.126	116.499	122.871	129.243	135.615
87.2711				91.0101	97.3822	103.754	110.126	116.499	122.871	129.243	135.615			91.0101	97.3822	103.754	110.126	116.499	122.871	129.243	135.615
PVIFA				3	4	5	6	7	8	9	10			3	4	5	6	7	8	9	10
Discount Ratio	Value		0	1.04284	1.11586	1.18887	1.26189	1.33491	1.40792	1.48094	1.55395		0	0.521422	0.557929	0.594437	0.630945	0.667453	0.703961	0.740468	0.776976
8	7.5361		1	1.03252	1.10481	1.1771	1.2494	1.32169	1.39398	1.46627	1.53857		1	0.518828	0.555154	0.59148	0.627806	0.664132	0.700458	0.736784	0.773111
7	7.9427		2	1.0224	1.09398	1.16556	1.23715	1.30873	1.38031	1.4519	1.52348		2	0.516259	0.552405	0.588552	0.624698	0.660844	0.696991	0.733137	0.769283
6	8.3838		3	1.01247	1.08336	1.15425	1.22514	1.29602	1.36691	1.4378	1.50869		3	0.513716	0.549684	0.585652	0.621621	0.657589	0.693557	0.729525	0.765494
5	8.8633		4	1.00273	1.07294	1.14315	1.21336	1.28356	1.35377	1.42398	1.49418		4	0.511198	0.54699	0.582782	0.618574	0.654365	0.690157	0.725949	0.761741
4	9.3851		5	0.993184	1.06272	1.13226	1.2018	1.27134	1.34088	1.41042	1.47995		5	0.508704	0.544321	0.579939	0.615556	0.651173	0.686791	0.722408	0.758025
3	9.954		6	0.983814	1.0527	1.12158	1.19046	1.25934	1.32823	1.39711	1.46599		6	0.506235	0.541679	0.577124	0.612568	0.648012	0.683457	0.718901	0.754346
2	10.5753		7	0.97462	1.04286	1.1111	1.17934	1.24758	1.31581	1.38405	1.45229		7	0.503789	0.539062	0.574335	0.609609	0.644882	0.680155	0.715428	0.750702
1	11.2551		8	0.965596	1.0332	1.10081	1.16842	1.23602	1.30363	1.37124	1.43884		8	0.501367	0.536471	0.571574	0.606678	0.641782	0.676885	0.711989	0.747092
0	12		9	0.956737	1.02372	1.09071	1.1577	1.22468	1.29167	1.35866	1.42564		9	0.498968	0.533904	0.568839	0.603775	0.638711	0.673646	0.708582	0.743518
Choosed Value			10	0.948039	1.01442	1.08079	1.14717	1.21355	1.27993	1.34631	1.41268		10	0.496592	0.531361	0.566131	0.6009	0.635669	0.670439	0.705208	0.739977
8.8633
PVIFA1
Discount Ratio	Value		Only consider electricity										Include thermal power (treat as equal to pv power)
8	8.13899			O&M Ratio										O&M Ratio
7	8.49869			3	4	5	6	7	8	9	10			3	4	5	6	7	8	9	10
6	8.88683	Output Power Improvement Ratio	0	1.04284	1.11586	1.18887	1.26189	1.33491	1.40792	1.48094	1.55395	Output Power Improvement Ratio	0	0.521422	0.557929	0.594437	0.630945	0.667453	0.703961	0.740468	0.776976
5	9.30647		1	1.03252	1.10481	1.1771	1.2494	1.32169	1.39398	1.46627	1.53857		1	0.518828	0.555154	0.59148	0.627806	0.664132	0.700458	0.736784	0.773111
4	9.7605		2	1.0224	1.09398	1.16556	1.23715	1.30873	1.38031	1.4519	1.52348		2	0.516259	0.552405	0.588552	0.624698	0.660844	0.696991	0.733137	0.769283
3	10.2526		3	1.01247	1.08336	1.15425	1.22514	1.29602	1.36691	1.4378	1.50869		3	0.513716	0.549684	0.585652	0.621621	0.657589	0.693557	0.729525	0.765494
2	10.7868		4	1.00273	1.07294	1.14315	1.21336	1.28356	1.35377	1.42398	1.49418		4	0.511198	0.54699	0.582782	0.618574	0.654365	0.690157	0.725949	0.761741
1	11.3677		5	0.993184	1.06272	1.13226	1.2018	1.27134	1.34088	1.41042	1.47995		5	0.508704	0.544321	0.579939	0.615556	0.651173	0.686791	0.722408	0.758025
0	12		6	0.983814	1.0527	1.12158	1.19046	1.25934	1.32823	1.39711	1.46599		6	0.506235	0.541679	0.577124	0.612568	0.648012	0.683457	0.718901	0.754346
Choosed Value			7	0.97462	1.04286	1.1111	1.17934	1.24758	1.31581	1.38405	1.45229		7	0.503789	0.539062	0.574335	0.609609	0.644882	0.680155	0.715428	0.750702
9.30647			8	0.965596	1.0332	1.10081	1.16842	1.23602	1.30363	1.37124	1.43884		8	0.501367	0.536471	0.571574	0.606678	0.641782	0.676885	0.711989	0.747092
			9	0.956737	1.02372	1.09071	1.1577	1.22468	1.29167	1.35866	1.42564		9	0.498968	0.533904	0.568839	0.603775	0.638711	0.673646	0.708582	0.743518
			10	0.948039	1.01442	1.08079	1.14717	1.21355	1.27993	1.34631	1.41268		10	0.496592	0.531361	0.566131	0.6009	0.635669	0.670439	0.705208	0.739977

## Sheet: Spray cooling result
PV Total Lifetime Cost			Spray cooling
Discount Ratio	Value			3	4	5	6	7	8	9	10			3	4	5	6	7	8	9	10
8	84.5262			93.6841	100.243	106.803	113.362	119.922	126.481	133.04	139.6			93.6841	100.243	106.803	113.362	119.922	126.481	133.04	139.6
7	85.3671			93.6841	100.243	106.803	113.362	119.922	126.481	133.04	139.6			93.6841	100.243	106.803	113.362	119.922	126.481	133.04	139.6
6	86.2794			93.6841	100.243	106.803	113.362	119.922	126.481	133.04	139.6			93.6841	100.243	106.803	113.362	119.922	126.481	133.04	139.6
5	87.2711			93.6841	100.243	106.803	113.362	119.922	126.481	133.04	139.6			93.6841	100.243	106.803	113.362	119.922	126.481	133.04	139.6
4	88.3503			93.6841	100.243	106.803	113.362	119.922	126.481	133.04	139.6			93.6841	100.243	106.803	113.362	119.922	126.481	133.04	139.6
3	89.5269			93.6841	100.243	106.803	113.362	119.922	126.481	133.04	139.6			93.6841	100.243	106.803	113.362	119.922	126.481	133.04	139.6
2	90.8118			93.6841	100.243	106.803	113.362	119.922	126.481	133.04	139.6			93.6841	100.243	106.803	113.362	119.922	126.481	133.04	139.6
1	92.2178			93.6841	100.243	106.803	113.362	119.922	126.481	133.04	139.6			93.6841	100.243	106.803	113.362	119.922	126.481	133.04	139.6
0	93.7584			93.6841	100.243	106.803	113.362	119.922	126.481	133.04	139.6			93.6841	100.243	106.803	113.362	119.922	126.481	133.04	139.6
Choosed Value				93.6841	100.243	106.803	113.362	119.922	126.481	133.04	139.6			93.6841	100.243	106.803	113.362	119.922	126.481	133.04	139.6
87.2711				93.6841	100.243	106.803	113.362	119.922	126.481	133.04	139.6			93.6841	100.243	106.803	113.362	119.922	126.481	133.04	139.6
PVIFA				3	4	5	6	7	8	9	10			3	4	5	6	7	8	9	10
Discount Ratio	Value		0	1.07348	1.14864	1.22381	1.29897	1.37413	1.44929	1.52445	1.59961		0	0.536742	0.574322	0.611903	0.649483	0.687064	0.724644	0.762224	0.799805
8	7.5361		1	1.06286	1.13727	1.21169	1.28611	1.36052	1.43494	1.50936	1.58377		1	0.534071	0.571465	0.608858	0.646252	0.683645	0.721039	0.758432	0.795826
7	7.9427		2	1.05243	1.12612	1.19981	1.2735	1.34718	1.42087	1.49456	1.56824		2	0.531428	0.568636	0.605844	0.643053	0.680261	0.717469	0.754678	0.791886
6	8.3838		3	1.04222	1.11519	1.18816	1.26113	1.3341	1.40708	1.48005	1.55302		3	0.52881	0.565835	0.60286	0.639885	0.67691	0.713935	0.75096	0.787985
5	8.8633		4	1.0322	1.10447	1.17674	1.24901	1.32128	1.39355	1.46582	1.53809		4	0.526217	0.563061	0.599905	0.636748	0.673592	0.710435	0.747279	0.784122
4	9.3851		5	1.02237	1.09395	1.16553	1.23711	1.30869	1.38027	1.45186	1.52344		5	0.523651	0.560314	0.596978	0.633642	0.670306	0.70697	0.743634	0.780297
3	9.954		6	1.01272	1.08363	1.15453	1.22544	1.29635	1.36725	1.43816	1.50907		6	0.521109	0.557594	0.59408	0.630566	0.667052	0.703538	0.740024	0.77651
2	10.5753		7	1.00326	1.0735	1.14374	1.21399	1.28423	1.35447	1.42472	1.49496		7	0.518591	0.554901	0.59121	0.62752	0.663829	0.700139	0.736449	0.772758
1	11.2551		8	0.993966	1.06356	1.13315	1.20275	1.27234	1.34193	1.41153	1.48112		8	0.516098	0.552233	0.588368	0.624503	0.660638	0.696773	0.732908	0.769043
0	12		9	0.984847	1.0538	1.12276	1.19171	1.26067	1.32962	1.39858	1.46753		9	0.513628	0.549591	0.585553	0.621515	0.657477	0.693439	0.729401	0.765363
Choosed Value			10	0.975894	1.04422	1.11255	1.18088	1.24921	1.31753	1.38586	1.45419		10	0.511183	0.546974	0.582764	0.618555	0.654346	0.690137	0.725928	0.761719
8.8633
PVIFA1
Discount Ratio	Value		Only consider electricity										Include thermal power (treat as equal to pv power)
8	8.13899			O&M Ratio										O&M Ratio
7	8.49869			3	4	5	6	7	8	9	10			3	4	5	6	7	8	9	10
6	8.88683	Output Power Improvement Ratio	0	1.07348	1.14864	1.22381	1.29897	1.37413	1.44929	1.52445	1.59961	Output Power Improvement Ratio	0	0.536742	0.574322	0.611903	0.649483	0.687064	0.724644	0.762224	0.799805
5	9.30647		1	1.06286	1.13727	1.21169	1.28611	1.36052	1.43494	1.50936	1.58377		1	0.534071	0.571465	0.608858	0.646252	0.683645	0.721039	0.758432	0.795826
4	9.7605		2	1.05243	1.12612	1.19981	1.2735	1.34718	1.42087	1.49456	1.56824		2	0.531428	0.568636	0.605844	0.643053	0.680261	0.717469	0.754678	0.791886
3	10.2526		3	1.04222	1.11519	1.18816	1.26113	1.3341	1.40708	1.48005	1.55302		3	0.52881	0.565835	0.60286	0.639885	0.67691	0.713935	0.75096	0.787985
2	10.7868		4	1.0322	1.10447	1.17674	1.24901	1.32128	1.39355	1.46582	1.53809		4	0.526217	0.563061	0.599905	0.636748	0.673592	0.710435	0.747279	0.784122
1	11.3677		5	1.02237	1.09395	1.16553	1.23711	1.30869	1.38027	1.45186	1.52344		5	0.523651	0.560314	0.596978	0.633642	0.670306	0.70697	0.743634	0.780297
0	12		6	1.01272	1.08363	1.15453	1.22544	1.29635	1.36725	1.43816	1.50907		6	0.521109	0.557594	0.59408	0.630566	0.667052	0.703538	0.740024	0.77651
Choosed Value			7	1.00326	1.0735	1.14374	1.21399	1.28423	1.35447	1.42472	1.49496		7	0.518591	0.554901	0.59121	0.62752	0.663829	0.700139	0.736449	0.772758
9.30647			8	0.993966	1.06356	1.13315	1.20275	1.27234	1.34193	1.41153	1.48112		8	0.516098	0.552233	0.588368	0.624503	0.660638	0.696773	0.732908	0.769043
			9	0.984847	1.0538	1.12276	1.19171	1.26067	1.32962	1.39858	1.46753		9	0.513628	0.549591	0.585553	0.621515	0.657477	0.693439	0.729401	0.765363
			10	0.975894	1.04422	1.11255	1.18088	1.24921	1.31753	1.38586	1.45419		10	0.511183	0.546974	0.582764	0.618555	0.654346	0.690137	0.725928	0.761719

## Sheet: Flat plate cooling result
PV Total Lifetime Cost			Flat plate
Discount Ratio	Value			3	4	5	6	7	8	9	10			3	4	5	6	7	8	9	10
8	84.5262			94.6006	101.224	107.848	114.471	121.095	127.718	134.342	140.965			94.6006	101.224	107.848	114.471	121.095	127.718	134.342	140.965
7	85.3671			94.6006	101.224	107.848	114.471	121.095	127.718	134.342	140.965			94.6006	101.224	107.848	114.471	121.095	127.718	134.342	140.965
6	86.2794			94.6006	101.224	107.848	114.471	121.095	127.718	134.342	140.965			94.6006	101.224	107.848	114.471	121.095	127.718	134.342	140.965
5	87.2711			94.6006	101.224	107.848	114.471	121.095	127.718	134.342	140.965			94.6006	101.224	107.848	114.471	121.095	127.718	134.342	140.965
4	88.3503			94.6006	101.224	107.848	114.471	121.095	127.718	134.342	140.965			94.6006	101.224	107.848	114.471	121.095	127.718	134.342	140.965
3	89.5269			94.6006	101.224	107.848	114.471	121.095	127.718	134.342	140.965			94.6006	101.224	107.848	114.471	121.095	127.718	134.342	140.965
2	90.8118			94.6006	101.224	107.848	114.471	121.095	127.718	134.342	140.965			94.6006	101.224	107.848	114.471	121.095	127.718	134.342	140.965
1	92.2178			94.6006	101.224	107.848	114.471	121.095	127.718	134.342	140.965			94.6006	101.224	107.848	114.471	121.095	127.718	134.342	140.965
0	93.7584			94.6006	101.224	107.848	114.471	121.095	127.718	134.342	140.965			94.6006	101.224	107.848	114.471	121.095	127.718	134.342	140.965
Choosed Value				94.6006	101.224	107.848	114.471	121.095	127.718	134.342	140.965			94.6006	101.224	107.848	114.471	121.095	127.718	134.342	140.965
87.2711				94.6006	101.224	107.848	114.471	121.095	127.718	134.342	140.965			94.6006	101.224	107.848	114.471	121.095	127.718	134.342	140.965
PVIFA				3	4	5	6	7	8	9	10			3	4	5	6	7	8	9	10
Discount Ratio	Value		0	1.08399	1.15988	1.23578	1.31167	1.38757	1.46347	1.53936	1.61526		0	0.541993	0.579941	0.617889	0.655837	0.693785	0.731734	0.769682	0.80763
8	7.5361		1	1.07325	1.1484	1.22354	1.29869	1.37383	1.44898	1.52412	1.59927		1	0.539297	0.577056	0.614815	0.652574	0.690334	0.728093	0.765852	0.803612
7	7.9427		2	1.06273	1.13714	1.21155	1.28596	1.36036	1.43477	1.50918	1.58359		2	0.536627	0.574199	0.611772	0.649344	0.686916	0.724489	0.762061	0.799633
6	8.3838		3	1.05241	1.1261	1.19978	1.27347	1.34716	1.42084	1.49453	1.56821		3	0.533983	0.571371	0.608758	0.646145	0.683532	0.72092	0.758307	0.795694
5	8.8633		4	1.04229	1.11527	1.18825	1.26123	1.3342	1.40718	1.48016	1.55313		4	0.531366	0.56857	0.605774	0.642978	0.680182	0.717386	0.75459	0.791794
4	9.3851		5	1.03237	1.10465	1.17693	1.24921	1.3215	1.39378	1.46606	1.53834		5	0.528774	0.565796	0.602819	0.639841	0.676864	0.713886	0.750909	0.787931
3	9.954		6	1.02263	1.09423	1.16583	1.23743	1.30903	1.38063	1.45223	1.52383		6	0.526207	0.56305	0.599892	0.636735	0.673578	0.710421	0.747264	0.784107
2	10.5753		7	1.01307	1.084	1.15493	1.22586	1.2968	1.36773	1.43866	1.50959		7	0.523665	0.56033	0.596994	0.633659	0.670324	0.706989	0.743654	0.780319
1	11.2551		8	1.00369	1.07397	1.14424	1.21451	1.28479	1.35506	1.42534	1.49561		8	0.521147	0.557636	0.594124	0.630613	0.667101	0.70359	0.740079	0.776567
0	12		9	0.994483	1.06411	1.13374	1.20337	1.273	1.34263	1.41226	1.48189		9	0.518654	0.554968	0.591282	0.627596	0.66391	0.700224	0.736537	0.772851
Choosed Value			10	0.985442	1.05444	1.12343	1.19243	1.26143	1.33042	1.39942	1.46842		10	0.516184	0.552325	0.588466	0.624607	0.660748	0.696889	0.73303	0.769171
8.8633
			Only consider electricity										Include thermal power (treat as equal to pv power)
				O&M Ratio										O&M Ratio
				3	4	5	6	7	8	9	10			3	4	5	6	7	8	9	10
		Output Power Improvement Ratio	0	1.08399	1.15988	1.23578	1.31167	1.38757	1.46347	1.53936	1.61526	Output Power Improvement Ratio	0	0.541993	0.579941	0.617889	0.655837	0.693785	0.731734	0.769682	0.80763
			1	1.07325	1.1484	1.22354	1.29869	1.37383	1.44898	1.52412	1.59927		1	0.539297	0.577056	0.614815	0.652574	0.690334	0.728093	0.765852	0.803612
			2	1.06273	1.13714	1.21155	1.28596	1.36036	1.43477	1.50918	1.58359		2	0.536627	0.574199	0.611772	0.649344	0.686916	0.724489	0.762061	0.799633
			3	1.05241	1.1261	1.19978	1.27347	1.34716	1.42084	1.49453	1.56821		3	0.533983	0.571371	0.608758	0.646145	0.683532	0.72092	0.758307	0.795694
			4	1.04229	1.11527	1.18825	1.26123	1.3342	1.40718	1.48016	1.55313		4	0.531366	0.56857	0.605774	0.642978	0.680182	0.717386	0.75459	0.791794
			5	1.03237	1.10465	1.17693	1.24921	1.3215	1.39378	1.46606	1.53834		5	0.528774	0.565796	0.602819	0.639841	0.676864	0.713886	0.750909	0.787931
			6	1.02263	1.09423	1.16583	1.23743	1.30903	1.38063	1.45223	1.52383		6	0.526207	0.56305	0.599892	0.636735	0.673578	0.710421	0.747264	0.784107
			7	1.01307	1.084	1.15493	1.22586	1.2968	1.36773	1.43866	1.50959		7	0.523665	0.56033	0.596994	0.633659	0.670324	0.706989	0.743654	0.780319
			8	1.00369	1.07397	1.14424	1.21451	1.28479	1.35506	1.42534	1.49561		8	0.521147	0.557636	0.594124	0.630613	0.667101	0.70359	0.740079	0.776567
			9	0.994483	1.06411	1.13374	1.20337	1.273	1.34263	1.41226	1.48189		9	0.518654	0.554968	0.591282	0.627596	0.66391	0.700224	0.736537	0.772851
			10	0.985442	1.05444	1.12343	1.19243	1.26143	1.33042	1.39942	1.46842		10	0.516184	0.552325	0.588466	0.624607	0.660748	0.696889	0.73303	0.769171

## Sheet: Tube plate cooling result
PV Total Lifetime Cost			Tube plate
Discount Ratio	Value			3	4	5	6	7	8	9	10			3	4	5	6	7	8	9	10
8	84.5262			101.158	108.241	115.323	122.406	129.489	136.571	143.654	150.737			101.158	108.241	115.323	122.406	129.489	136.571	143.654	150.737
7	85.3671			101.158	108.241	115.323	122.406	129.489	136.571	143.654	150.737			101.158	108.241	115.323	122.406	129.489	136.571	143.654	150.737
6	86.2794			101.158	108.241	115.323	122.406	129.489	136.571	143.654	150.737			101.158	108.241	115.323	122.406	129.489	136.571	143.654	150.737
5	87.2711			101.158	108.241	115.323	122.406	129.489	136.571	143.654	150.737			101.158	108.241	115.323	122.406	129.489	136.571	143.654	150.737
4	88.3503			101.158	108.241	115.323	122.406	129.489	136.571	143.654	150.737			101.158	108.241	115.323	122.406	129.489	136.571	143.654	150.737
3	89.5269			101.158	108.241	115.323	122.406	129.489	136.571	143.654	150.737			101.158	108.241	115.323	122.406	129.489	136.571	143.654	150.737
2	90.8118			101.158	108.241	115.323	122.406	129.489	136.571	143.654	150.737			101.158	108.241	115.323	122.406	129.489	136.571	143.654	150.737
1	92.2178			101.158	108.241	115.323	122.406	129.489	136.571	143.654	150.737			101.158	108.241	115.323	122.406	129.489	136.571	143.654	150.737
0	93.7584			101.158	108.241	115.323	122.406	129.489	136.571	143.654	150.737			101.158	108.241	115.323	122.406	129.489	136.571	143.654	150.737
Choosed Value				101.158	108.241	115.323	122.406	129.489	136.571	143.654	150.737			101.158	108.241	115.323	122.406	129.489	136.571	143.654	150.737
87.2711				101.158	108.241	115.323	122.406	129.489	136.571	143.654	150.737			101.158	108.241	115.323	122.406	129.489	136.571	143.654	150.737
PVIFA				3	4	5	6	7	8	9	10			3	4	5	6	7	8	9	10
Discount Ratio	Value		0	1.15912	1.24028	1.32144	1.4026	1.48375	1.56491	1.64607	1.72722		0	0.579562	0.62014	0.660719	0.701298	0.741876	0.782455	0.823033	0.863612
8	7.5361		1	1.14765	1.228	1.30835	1.38871	1.46906	1.54941	1.62977	1.71012		1	0.576679	0.617055	0.657432	0.697808	0.738185	0.778562	0.818938	0.859315
7	7.9427		2	1.1364	1.21596	1.29553	1.37509	1.45466	1.53422	1.61379	1.69336		2	0.573824	0.614	0.654177	0.694354	0.734531	0.774707	0.814884	0.855061
6	8.3838		3	1.12536	1.20416	1.28295	1.36174	1.44054	1.51933	1.59812	1.67692		3	0.570997	0.610976	0.650955	0.690934	0.730912	0.770891	0.81087	0.850849
5	8.8633		4	1.11454	1.19258	1.27061	1.34865	1.42668	1.50472	1.58276	1.66079		4	0.568198	0.607981	0.647764	0.687547	0.727329	0.767112	0.806895	0.846678
4	9.3851		5	1.10393	1.18122	1.25851	1.3358	1.4131	1.49039	1.56768	1.64497		5	0.565426	0.605015	0.644604	0.684193	0.723781	0.76337	0.802959	0.842548
3	9.954		6	1.09351	1.17008	1.24664	1.3232	1.39977	1.47633	1.55289	1.62946		6	0.562681	0.602078	0.641475	0.680871	0.720268	0.759665	0.799061	0.838458
2	10.5753		7	1.08329	1.15914	1.23499	1.31084	1.38668	1.46253	1.53838	1.61423		7	0.559963	0.59917	0.638376	0.677582	0.716788	0.755995	0.795201	0.834407
1	11.2551		8	1.07326	1.14841	1.22355	1.2987	1.37384	1.44899	1.52414	1.59928		8	0.557271	0.596289	0.635307	0.674325	0.713342	0.75236	0.791378	0.830396
0	12		9	1.06342	1.13787	1.21233	1.28678	1.36124	1.4357	1.51015	1.58461		9	0.554605	0.593436	0.632267	0.671098	0.709929	0.74876	0.787591	0.826423
Choosed Value			10	1.05375	1.12753	1.20131	1.27509	1.34887	1.42264	1.49642	1.5702		10	0.551964	0.59061	0.629256	0.667902	0.706549	0.745195	0.783841	0.822487
8.8633
			Only consider electricity										Include thermal power (treat as equal to pv power)
				O&M Ratio										O&M Ratio
				3	4	5	6	7	8	9	10			3	4	5	6	7	8	9	10
		Output Power Improvement Ratio	0	1.15912	1.24028	1.32144	1.4026	1.48375	1.56491	1.64607	1.72722	Output Power Improvement Ratio	0	0.579562	0.62014	0.660719	0.701298	0.741876	0.782455	0.823033	0.863612
			1	1.14765	1.228	1.30835	1.38871	1.46906	1.54941	1.62977	1.71012		1	0.576679	0.617055	0.657432	0.697808	0.738185	0.778562	0.818938	0.859315
			2	1.1364	1.21596	1.29553	1.37509	1.45466	1.53422	1.61379	1.69336		2	0.573824	0.614	0.654177	0.694354	0.734531	0.774707	0.814884	0.855061
			3	1.12536	1.20416	1.28295	1.36174	1.44054	1.51933	1.59812	1.67692		3	0.570997	0.610976	0.650955	0.690934	0.730912	0.770891	0.81087	0.850849
			4	1.11454	1.19258	1.27061	1.34865	1.42668	1.50472	1.58276	1.66079		4	0.568198	0.607981	0.647764	0.687547	0.727329	0.767112	0.806895	0.846678
			5	1.10393	1.18122	1.25851	1.3358	1.4131	1.49039	1.56768	1.64497		5	0.565426	0.605015	0.644604	0.684193	0.723781	0.76337	0.802959	0.842548
			6	1.09351	1.17008	1.24664	1.3232	1.39977	1.47633	1.55289	1.62946		6	0.562681	0.602078	0.641475	0.680871	0.720268	0.759665	0.799061	0.838458
			7	1.08329	1.15914	1.23499	1.31084	1.38668	1.46253	1.53838	1.61423		7	0.559963	0.59917	0.638376	0.677582	0.716788	0.755995	0.795201	0.834407
			8	1.07326	1.14841	1.22355	1.2987	1.37384	1.44899	1.52414	1.59928		8	0.557271	0.596289	0.635307	0.674325	0.713342	0.75236	0.791378	0.830396
			9	1.06342	1.13787	1.21233	1.28678	1.36124	1.4357	1.51015	1.58461		9	0.554605	0.593436	0.632267	0.671098	0.709929	0.74876	0.787591	0.826423
			10	1.05375	1.12753	1.20131	1.27509	1.34887	1.42264	1.49642	1.5702		10	0.551964	0.59061	0.629256	0.667902	0.706549	0.745195	0.783841	0.822487
