# Supplementary material for: Self-adaptive interfacial cooling for sustainable energy–water cogeneration in photovoltaics
Source: Royal Society of Chemistry journal article supplement (doi:10.1039/d5el00150a), 2025-01-01
Supplement: d5el00150a2.xlsx [file d5el00150a2.xlsx]

## Sheet: Data
Year	Required Capacity (GW)		Year	Yearly Required Capacity (GW)		Year	Yearly Capacity Reduction Rate	Yearly Capital Expenditure per GW	Yearly Greenhouse gas per GW	Yearly Land Use per GW	Yearly Water Use per GW		Year	Required Energy Demand (TWh)
2024	1852.36		2025	1661.27		2025	0.038	290700000	28849600	10668804	19418000		2025	3044.74
2025	3513.63		2026	1643.61		2026	0.0361	276165000	27407120	1.01354e+07	18447100		2026	3763.11
2026	5157.24		2027	1625.95		2027	0.034295	2.62357e+08	2.60368e+07	9.6286e+06	1.75247e+07		2027	4622.74
2027	6783.19		2028	1608.29		2028	0.0325802	2.49239e+08	2.47349e+07	9.14717e+06	1.66485e+07		2028	5644.07
2028	8391.48		2029	1590.63		2029	0.0309512	2.36777e+08	2.34982e+07	8.68981e+06	1.58161e+07		2029	6848.72
2029	9982.1		2030	1572.96		2030	0.0294037	2.24938e+08	2.23233e+07	8.25532e+06	1.50253e+07		2030	8259.12
2030	11555.1		2031	1555.3		2031	0.0279335	2.13691e+08	2.12071e+07	7.84255e+06	1.4274e+07		2031	9898.03
2031	13110.4		2032	1537.64		2032	0.0265368	2.03007e+08	2.01468e+07	7.45042e+06	1.35603e+07		2032	11787.9
2032	14648		2033	1519.98		2033	0.02521	1.92856e+08	1.91394e+07	7.0779e+06	1.28823e+07		2033	13950.2
2033	16168		2034	1502.32		2034	0.0239495	1.83214e+08	1.81824e+07	6.72401e+06	1.22382e+07		2034	16404.6
2034	17670.3		2035	1484.66		2035	0.022752	1.74053e+08	1.72733e+07	6.38781e+06	1.16263e+07		2035	19167.7
2035	19155		2036	1466.99		2036	0.0216144	1.6535e+08	1.64097e+07	6.06842e+06	1.1045e+07		2036	22252.5
2036	20622		2037	1449.33		2037	0.0205337	1.57083e+08	1.55892e+07	5.765e+06	1.04927e+07		2037	25666.8
2037	22071.3		2038	1431.67		2038	0.019507	1.49229e+08	1.48097e+07	5.47675e+06	9.96808e+06		2038	29412.6
2038	23503		2039	1414.01		2039	0.0185316	1.41767e+08	1.40692e+07	5.20291e+06	9.46967e+06		2039	33484.3
2039	24917		2040	1396.35		2040	0.0176051	1.34679e+08	1.33658e+07	4.94276e+06	8.99619e+06		2040	37868.6
2040	26313.3		2041	1378.69		2041	0.0167248	1.27945e+08	1.26975e+07	4.69563e+06	8.54638e+06		2041	42543
2041	27692		2042	1361.02		2042	0.0158886	1.21548e+08	1.20626e+07	4.46084e+06	8.11906e+06		2042	47475.3
2042	29053		2043	1343.36		2043	0.0150941	1.1547e+08	1.14595e+07	4.2378e+06	7.71311e+06		2043	52623.3
2043	30396.4		2044	1325.7		2044	0.0143394	1.09697e+08	1.08865e+07	4.02591e+06	7.32745e+06		2044	57934.9
2044	31722.1		2045	1308.04		2045	0.0136225	1.04212e+08	1.03422e+07	3.82462e+06	6.96108e+06		2045	63348.1
2045	33030.1		2046	1290.38		2046	0.0129413	9.90013e+07	9.82507e+06	3.63339e+06	6.61303e+06		2046	68792
2046	34320.5		2047	1272.72		2047	0.0122943	9.40512e+07	9.33381e+06	3.45172e+06	6.28237e+06		2047	74187.8
2047	35593.2		2048	1255.05		2048	0.0116796	8.93486e+07	8.86712e+06	3.27913e+06	5.96826e+06		2048	77620.7
2048	36848.3		2049	1237.39		2049	0.0110956	8.48812e+07	8.42377e+06	3.11517e+06	5.66984e+06		2049	80397.6
2049	38085.7		2050	1219.73		2050	0.0105408	8.06371e+07	8.00258e+06	2.95941e+06	5.38635e+06		2050	83123.9
2050	39305.4
Initial Capital Expenditure per GW				306000000			Greenhouse gas emissions (kgCO2/(MWh/a))
Annual Capital Expenditure Reduction Rate				0.05			52
Annual Solar Cell Temperature Coefficient Reduction Rate				0.05
Capacity Reduction Rate due to PV cooling				0.04			Land use (m2/(MWh/a))
							19.23
Annual Manufacturing-related Greenhouse Gas Emission Reduction Rate				0.05
Annual Land Use Reduction Rate				0.05			Water use (m3/(MWh/a))
Annual Dissipated Water Use Reduction Rate				0.05			35
Initial Greenhouse Gas Emissions per GW				30368000			MWh/a to MW transfer coefficient
Initial Land Use per GW				11230320			584
Initial Dissipated Water Use per GW				20440000

## Sheet: Cost Saving
Annual Cost Saving from Reduced Installed Capacity
Year	Yearly Required Capacity	Annual Capacity Saving	Annual Cost Saving		Discount Ratio	PVC	Present Value		Total Cost Saving
2025	1661.27	63.1283	1.83514e+10		5	0.952381	1.74775e+10	17.4775	114.723	Billon Dollar
2026	1643.61	59.3343	1.63861e+10			0.907029	1.48626e+10	32.3402
2027	1625.95	55.7619	1.46295e+10			0.863838	1.26375e+10	44.9777
2028	1608.29	52.3984	1.30597e+10			0.822702	1.07443e+10	55.722
2029	1590.63	49.2318	1.1657e+10			0.783526	9.13353e+09	64.8555
2030	1572.96	46.2509	1.04036e+10			0.746215	7.76332e+09	72.6188
2031	1555.3	43.445	9.28382e+09			0.710681	6.59784e+09	79.2166
2032	1537.64	40.8041	8.2835e+09			0.676839	5.6066e+09	84.8232
2033	1519.98	38.3186	7.38999e+09			0.644609	4.76365e+09	89.5869
2034	1502.32	35.9797	6.59197e+09			0.613913	4.0469e+09	93.6338
2035	1484.66	33.7789	5.87931e+09			0.584679	3.43751e+09	97.0713
2036	1466.99	31.7082	5.24296e+09			0.556837	2.91947e+09	99.9908
2037	1449.33	29.7601	4.6748e+09			0.530321	2.47915e+09	102.47
2038	1431.67	27.9276	4.16759e+09			0.505068	2.10492e+09	104.575
2039	1414.01	26.2039	3.71485e+09			0.481017	1.78691e+09	106.362
2040	1396.35	24.5828	3.31078e+09			0.458112	1.51671e+09	107.878
2041	1378.69	23.0583	2.95019e+09			0.436297	1.28716e+09	109.166
2042	1361.02	21.6247	2.62843e+09			0.415521	1.09217e+09	110.258
2043	1343.36	20.2769	2.34138e+09			0.395734	9.26563e+08	111.184
2044	1325.7	19.0098	2.08531e+09			0.376889	7.85932e+08	111.97
2045	1308.04	17.8187	1.85692e+09			0.358942	6.66528e+08	112.637
2046	1290.38	16.6992	1.65324e+09			0.34185	5.65161e+08	113.202
2047	1272.72	15.6471	1.47163e+09			0.325571	4.79121e+08	113.681
2048	1255.05	14.6585	1.30972e+09			0.310068	4.06101e+08	114.087
2049	1237.39	13.7296	1.16538e+09			0.295303	3.44141e+08	114.431
2050	1219.73	12.8569	1.03675e+09			0.281241	2.91576e+08	114.723

## Sheet: Emission Saving
Annual Emission Saving from Reduced Installed Capacity
Year	Yearly Required Capacity	Annual Capacity Saving	Annual Emission Saving		Total Emission Saving
2025	1661.27	63.1283	1.82123e+09	1.82123e+06	1.60301e+07	tCO2
2026	1643.61	59.3343	1.62618e+09	1.62618e+06
2027	1625.95	55.7619	1.45186e+09	1.45186e+06	0.00481934	%
2028	1608.29	52.3984	1.29607e+09	1.29607e+06
2029	1590.63	49.2318	1.15686e+09	1.15686e+06
2030	1572.96	46.2509	1.03247e+09	1.03247e+06
2031	1555.3	43.445	9.21343e+08	921343
2032	1537.64	40.8041	8.2207e+08	822070
2033	1519.98	38.3186	7.33396e+08	733396
2034	1502.32	35.9797	6.54199e+08	654199
2035	1484.66	33.7789	5.83474e+08	583474
2036	1466.99	31.7082	5.20321e+08	520321
2037	1449.33	29.7601	4.63936e+08	463936
2038	1431.67	27.9276	4.136e+08	413600
2039	1414.01	26.2039	3.68669e+08	368669
2040	1396.35	24.5828	3.28568e+08	328568
2041	1378.69	23.0583	2.92782e+08	292782
2042	1361.02	21.6247	2.60851e+08	260851
2043	1343.36	20.2769	2.32363e+08	232363
2044	1325.7	19.0098	2.0695e+08	206950
2045	1308.04	17.8187	1.84284e+08	184284
2046	1290.38	16.6992	1.64071e+08	164071
2047	1272.72	15.6471	1.46047e+08	146047
2048	1255.05	14.6585	1.29979e+08	129979
2049	1237.39	13.7296	1.15655e+08	115655
2050	1219.73	12.8569	1.02889e+08	102889

## Sheet: Land Saving
Annual Land Use Saving from Reduced Installed Capacity
Year	Yearly Required Capacity	Annual Capacity Saving	Annual Land Use Saving		Total Land Use Saving
2025	1661.27	63.1283	6.73504e+08	673.504	5928.06	km2
2026	1643.61	59.3343	6.01375e+08	601.375
2027	1625.95	55.7619	5.36909e+08	536.909	0.000821346	%
2028	1608.29	52.3984	4.79297e+08	479.297
2029	1590.63	49.2318	4.27815e+08	427.815	0.00722934	%
2030	1572.96	46.2509	3.81816e+08	381.816
2031	1555.3	43.445	3.4072e+08	340.72
2032	1537.64	40.8041	3.04008e+08	304.008
2033	1519.98	38.3186	2.71216e+08	271.216
2034	1502.32	35.9797	2.41928e+08	241.928
2035	1484.66	33.7789	2.15773e+08	215.773
2036	1466.99	31.7082	1.92419e+08	192.419
2037	1449.33	29.7601	1.71567e+08	171.567
2038	1431.67	27.9276	1.52952e+08	152.952
2039	1414.01	26.2039	1.36337e+08	136.337
2040	1396.35	24.5828	1.21507e+08	121.507
2041	1378.69	23.0583	1.08273e+08	108.273
2042	1361.02	21.6247	9.64646e+07	96.4646
2043	1343.36	20.2769	8.59295e+07	85.9295
2044	1325.7	19.0098	7.65318e+07	76.5318
2045	1308.04	17.8187	6.81498e+07	68.1498
2046	1290.38	16.6992	6.06747e+07	60.6747
2047	1272.72	15.6471	5.40094e+07	54.0094
2048	1255.05	14.6585	4.80671e+07	48.0671
2049	1237.39	13.7296	4.27701e+07	42.7701
2050	1219.73	12.8569	3.8049e+07	38.049

## Sheet: Water Saving
Annual Water Saving from Reduced Installed Capacity						Annual Water Production from IEWC
Year	Yearly Required Capacity	Annual Capacity Saving	Annual Water Saving			Year	Required Energy Demand (TWh)	Annual Water Production	Total Water Saving			Annual Water Saving	Total Water Saving (Consider water production)
2025	1661.27	63.1283	1.22583e+09	1.22583		2025	3044.74	4.21133e+06	10.7895	×109 t		1.23004	12.0345	×109 t
2026	1643.61	59.3343	1.09455e+09	1.09455		2026	3763.11	5.20493e+06				1.09975
2027	1625.95	55.7619	9.77213e+08	0.977213		2027	4622.74	6.39393e+06	3.68307e-05	%		0.983607	3.69573e-05	%
2028	1608.29	52.3984	8.72355e+08	0.872355		2028	5644.07	7.80658e+06				0.880162
2029	1590.63	49.2318	7.78655e+08	0.778655		2029	6848.72	9.47279e+06	0.134869	%		0.788127	0.0153755	%
2030	1572.96	46.2509	6.94933e+08	0.694933		2030	8259.12	1.14236e+07				0.706356
2031	1555.3	43.445	6.20135e+08	0.620135		2031	9898.03	1.36904e+07				0.633825
2032	1537.64	40.8041	5.53316e+08	0.553316		2032	11787.9	1.63044e+07				0.569621
2033	1519.98	38.3186	4.93632e+08	0.493632		2033	13950.2	1.92952e+07				0.512927
2034	1502.32	35.9797	4.40326e+08	0.440326		2034	16404.6	2.269e+07				0.463016
2035	1484.66	33.7789	3.92723e+08	0.392723		2035	19167.7	2.65118e+07				0.419234
2036	1466.99	31.7082	3.50216e+08	0.350216		2036	22252.5	3.07785e+07				0.380994
2037	1449.33	29.7601	3.12264e+08	0.312264		2037	25666.8	3.5501e+07				0.347766
2038	1431.67	27.9276	2.78384e+08	0.278384		2038	29412.6	4.06819e+07				0.319066
2039	1414.01	26.2039	2.48143e+08	0.248143		2039	33484.3	4.63137e+07				0.294456
2040	1396.35	24.5828	2.21151e+08	0.221151		2040	37868.6	5.23779e+07				0.273529
2041	1378.69	23.0583	1.97065e+08	0.197065		2041	42543	5.88432e+07				0.255908
2042	1361.02	21.6247	1.75573e+08	0.175573		2042	47475.3	6.56653e+07				0.241238
2043	1343.36	20.2769	1.56398e+08	0.156398		2043	52623.3	7.27858e+07				0.229184
2044	1325.7	19.0098	1.39293e+08	0.139293		2044	57934.9	8.01325e+07				0.219426
2045	1308.04	17.8187	1.24038e+08	0.124038		2045	63348.1	8.76197e+07				0.211657
2046	1290.38	16.6992	1.10432e+08	0.110432		2046	68792	9.51494e+07				0.205582
2047	1272.72	15.6471	9.83011e+07	0.0983011		2047	74187.8	1.02613e+08				0.200914
2048	1255.05	14.6585	8.74856e+07	0.0874856		2048	77620.7	1.07361e+08				0.194846
2049	1237.39	13.7296	7.78446e+07	0.0778446		2049	80397.6	1.11202e+08				0.189046
2050	1219.73	12.8569	6.9252e+07	0.069252		2050	83123.9	1.14973e+08				0.184225
Energy required for the evaporation of water from 18°C to steam at standard atmospheric pressure (kJ/kg)				2602.76
